# Supplementary material
Source: publisher figshare collection journal article supplement (https://acs.figshare.com/ndownloader/files/4190314)
Supplement: Supplementary file 1 [file 4190314]

## Supporting Information

# Thin films of zinc oxide nanoparticles and poly(acrylic acid) fabricated by the layer-by-layer technique: a facile platform for outstanding properties

*Mohamed Eita<sup>1\*</sup>, Lars Wågberg<sup>2,3</sup> and Mamoun Muhammed<sup>1</sup>*

<sup>1</sup>Division of Functional Materials (FNM), Royal Institute of Technology (KTH), 16440 Kista-Stockholm, Sweden. <sup>2</sup>Institute of Polymer and Fibre Technology, Royal institute of technology (KTH), Teknikringen 58, SE- 10044 Stockholm, Sweden. <sup>3</sup>Wallenberg Wood Science Centre, Teknikringen 56, SE- 10044 Stockholm, Sweden.

\* Author to whom correspondence may be addressed. Tel. +(46) 8 790 8148, Fax: + (46) 8 790 9072, E-mail: eita@kth.se.

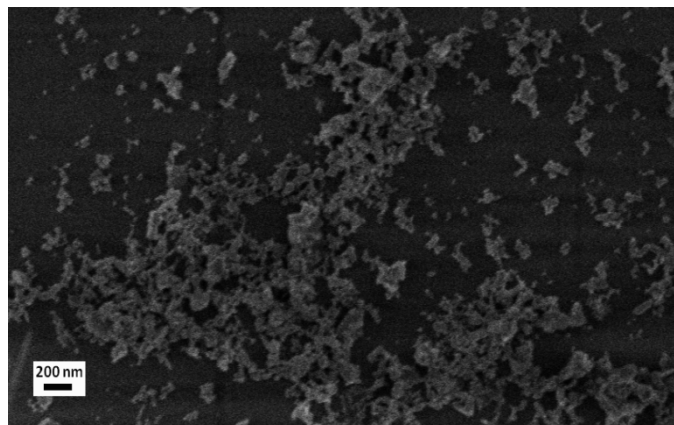

**Figure S1:** SEM image of a 2 bilayers PAH-(PAA-ZnO) thin film on glass substrate using ZnO dispersed in water without a surfactant.

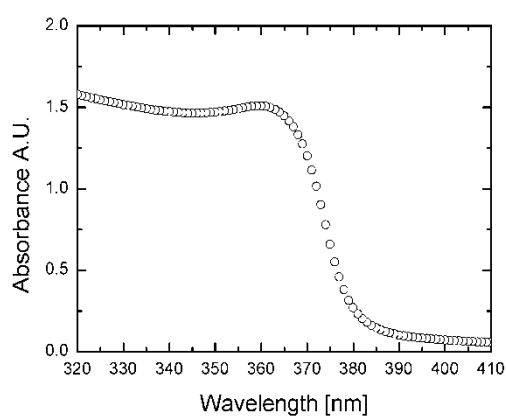

**Figure S2:** UV absorption spectra of the cationic surfactant-stabilized ZnO dispersion, absorption maximum at 361 nm.

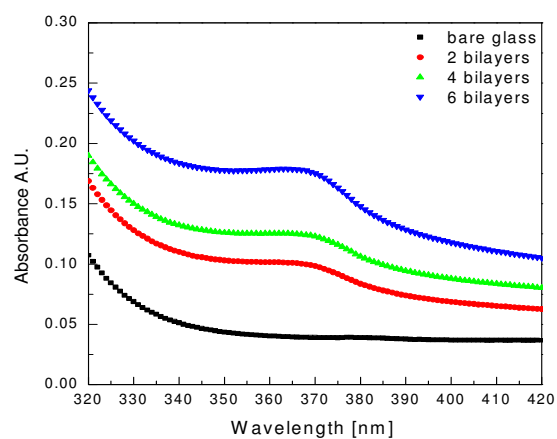

**Figure S3:** UV absorbance spectra of PAA/ZnO thin films prepared from a ZnO dispersion without a surfactant, absorbance increases with increasing the number of bilayers.

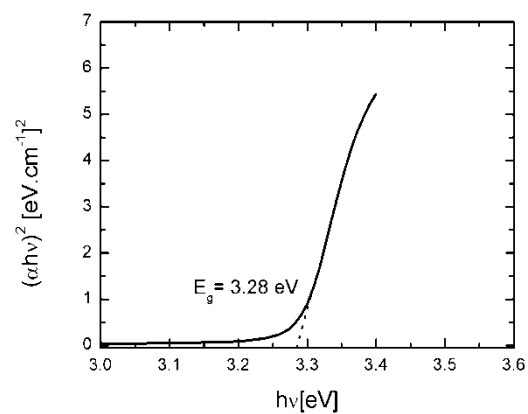

**Figure S4:** plot of  $(\alpha h\nu)^2$  versus  $(h\nu)$  of the surfactant-stabilized ZnO dispersion yielding the energy band gap ( $E_g$ ) at 3.28 eV.

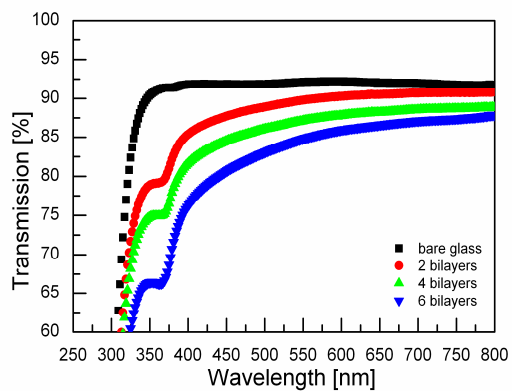

**Figure S5:** UV-vis transmittance spectra of PAA/ZnO thin films prepared from the ZnO dispersion without a surfactant. Transmittance is damped in the UV region, damping increases with increasing the number of bilayers, however transmittance in the visible region is also damped.
